# Supplementary material for: The organization of the transcriptional network in specific neuronal classes
Source: PubMed Central journal article supplement — Mol Syst Biol. 2009 Jul 28;5:291. doi: 10.1038/msb.2009.46 (PMC2724976; doi:10.1038/msb.2009.46), 2009-07-28
Supplement: msb200946-s1.pdf [file msb200946-s1.pdf]

## Supplementary Information

### Detailed Experimental Procedures

#### Microarray data and gene filtering

Raw data from all microarrays from Sugino et al. (2006) were imported into R (<http://www.r-project.org/>), scaled to the same average intensity, and normalized using the quantile normalization method from Bioconductor (<http://www.bioconductor.org/>) (Bolstad et al., 2003; Choe et al., 2005; Oldham et al., 2006). Presence or absence of probe sets was determined using the MAS 5.0 algorithm. Probe sets were selected based on their consistent presence in at least one cell type and a high coefficient of variation ( $>0.21$ ), resulting in the selection of 8,000 probe sets. (Note: although some genes are represented by multiple probe sets and other probe sets are not fully annotated, for consistency we refer to probe sets as “genes” and treat them independently throughout this work, unless otherwise noted.) This cohort of 8,000 genes was used to build the network (see below and Oldham et al., 2006). Since genes in modules tend to be highly connected, we selected the most highly connected genes for module detection. The network connectivity ( $k$ ) for all genes was calculated by summing the connection strengths between each gene and all other genes within the network, then scaling these values to lie between 0 and 1 (Oldham et al., 2006). Genes with a normalized connectivity greater than 0.11 were retained, resulting in a network of 4,097 genes.

#### Network construction

The network was constructed by calculating the absolute value of the pair-wise Pearson correlations between all genes, raising these correlations to a power, and creating a dissimilarity matrix based on topological overlap, which allows identification of modules of co-expressed genes (Oldham et al., 2006; Ravasz and Barabási, 2003; Zhang and Horvath, 2005). The power that selected to weight the correlations between genes is chosen to recapitulate scale-free topology, as proposed by Zhang and Horvath (2005). We used a power of  $b=6$  for this dataset, which resulted in an approximately scale-

free network ( $r^2=0.898$ ) and preserved connectivity (mean  $k=52$ ; median  $k=40.8$ ). Modules were created by clustering genes using the average linkage hierarchical clustering algorithm, which has been shown to be useful in analyzing gene expression by placing functionally related genes into groups (Eisen et al., 1998). As the dissimilarity matrix used in hierarchical clustering, we used (1-TO) because TO reflects the relative interconnectedness of two nodes within their local neighborhood, which creates more robust co-expression relationships (Yip and Horvath, 2007).

### **Module detection and visualization**

TO groups entities that share their local neighborhood and, by extension, membership in related functional groups (Barabási and Oltvai, 2004; Horvath et al., 2006; Oldham et al., 2006; Ravasz et al., 2002). We used a combination of dynamic tree cutting algorithms and subsequent evaluation of gene expression to isolate thirteen distinct modules that corresponded to different patterns of gene expression (Horvath et al., 2006; Langfelder et al., 2008). Each module was assigned a color and number to aid in their description. The results of the module detection algorithms were then tested for significance by calculating the average TO within a module and performing permutations using random samples from all genes within the network to generate an empiric p-value (Table I). All of the modules presented here were highly significant ( $p < 0.005$ ), which indicates that each module represents a group of genes that are more likely to be co-expressed than by chance, using TO as a metric of co-expression. Gene expression within modules was visualized by generating standard heat maps with normalized expression values (red denotes high expression, while green denotes low expression).

### **Modular gene expression**

To identify the defining characteristics of each module, singular value decomposition ( $X = UDV^T$ ) was performed and the first principal component (V1) or “module eigengene” was used to summarize the expression profile of a given module. The module eigengene explained a majority of the variance in each module (data not shown). In order to confirm the significance of module characterization, we created indicator vectors for each module, where populations with high expression

values were equal to one and those with low expression values were equal to zero. We then used a Kruskal-Wallis test to compare the module eigengene to the corresponding indicator vector (Oldham et al., 2006).

### **Module membership**

To extend the module definitions to all of the genes on the array platform, we calculated the strength of membership of each gene to each module. As described previously, the expression of each module can be summarized by its first principal component or module eigengene. In order to measure the module eigengene-based module membership ( $k_{ME}$ ), we calculated the Pearson correlation between the module eigengene and the expression of any gene. A gene that has a high correlation value (high  $k_{ME}$ ) will have a similar expression pattern to the other genes within the module, and therefore, it is related to the other genes within the module. Due to the fact that  $k_{ME}$  is a correlation, each  $k_{ME}$  value has a corresponding p-value. Therefore, we calculate  $k_{ME}$  and the corresponding p-value for all gene-module combinations to obtain a matrix, describing the membership of each gene to each module. This matrix is used to identify the module or modules to which each gene belongs, which aids in annotation of all genes.

### **Systematic validation of co-expression relationships**

We validated the co-expression relationships on the transcriptional level by obtaining all publicly available microarray data on the MOE430A platform, using the Celsius database that contains ~81,000 Affymetrix microarrays. Data was collected for the top one hundred genes with the highest  $k_{ME}$  within each module were obtained, as well as a group of 1,200 random genes. We calculated the mean Pearson correlation between one hundred random genes 1,000 times and calculated the mean and standard deviation for this expected distribution. We then calculated the mean Pearson correlation between all genes within the same module and converted this value to a Z-score using the expected distribution (correlation within module – mean of expected distribution/standard deviation of expected distribution). The Z-score was then converted to a p-value using the cumulative distribution function.

We validated co-expression relationship on the proteomic level by demonstrating that co-expressed genes are more likely to functionally interact. We used a database of protein-protein interactions, and we identified genes within each module that had a  $k_{ME} > 0.7$ . We calculated an expected distribution for each module by determining the number of interactions that would be expected by chance given the number of genes selected from each module. We then identified the number of protein-protein interactions between genes within the same module and converted this value to a Z-score using the mean and standard deviation of the expected distribution. The Z-score is then converted to a p-value using the cumulative distribution function.

### **Confirmation of expression with the Allen Brain Atlas**

We confirmed the expression of the genes in the black, brown, and midnight blue modules using the Allen Brain Atlas. For each module, we identified genes with a  $k_{ME}$  greater than 0.85. The expression of each of these genes was examined in the Allen Brain Atlas (<http://www.brainatlas.org/aba/>). Different regions of the brain were identified using the atlas that accompanies the *in situ* hybridization data. For the analysis that compared expression in layer V to layer VI, we identified gene expression in layer V of the cortex by comparing the expression to a known marker (*Zfp312*).

### ***In vivo* validation of network predictions**

Mice with a single large deletion of *Dlx1* and *Dlx2* have been previously characterized (Anderson et al., 1997). *Dlx1*<sup>-/-</sup>/*Dlx2*<sup>-/-</sup> mutants were identified based on their cleft palate and subsequently by PCR genotyping, but the sex of the specimens was not determined. RNA was purified from the cortex of embryonic day 15.5 wildtype and transgenic animals using Trizol (GibcoBRL). The NINDS/NIMH Microarray Consortium (<http://arrayconsortium.tgen.org/np2/home.do>) used the purified total RNA to generate biotin-labeled cRNA hybridization probes using the Affymetrix's GeneChip IVT Labeling Kit, which simultaneously performs *in vitro* transcription (a linear ~20-60-fold amplification) and biotin-labeling (see



[http://www.affymetrix.com/support/technical/technotes/ivt\\_technote.pdf](http://www.affymetrix.com/support/technical/technotes/ivt_technote.pdf)). They then performed the amplifications and hybridizations (in duplicate) using the Affymetrix Mouse Genome 430 2.0 array, which has 45,101 probe sets and coverage for 39,000 transcripts. Each expressed gene sequence is represented by 11 probe pairs on the array and each oligonucleotide probe is a 25mer. The arrays were scanned using GeneChip Operating Software (GCOS), which determines the signal intensity of each gene.

The *Rgs4* conditional knockout construct was generated by first cloning a linker into the SacII site of pm30. Pm30 contains a pgk-neo selectable marker flanked by FRT sites and one LoxP site; the linker introduced an additional LoxP site and a unique AvrII site. Next, an 8 kb SpeI restriction enzyme fragment (isolated from BAC RPCI-22-405J3, contains 5' regulatory regions, exon 1 and part of intron 1 (5' homology arm)) was cloned into the AvrII site of pm30 (Supplemental Fig 3). The remainder of exon 1 continuous through the 5' region of exon 5 (4 kb which contains the entire coding sequence except the first 15 amino acids encoded in exon 1) was amplified by PCR, cloned into the SallI site in the region between the LoxP sites of pm30 and then sequenced to confirm the absence of errors (Supplemental Fig 3). Finally, the 3' homology region (3kb including the 3' region of exon 5) was amplified by PCR, cloned into the ApaI site of pm30, and sequenced (Supp Figure 3). The construct was linearized at a unique XhoI site in the vector backbone and electroporated into TL1 (129SvEvTac) cells by the Vanderbilt Transgenic Mouse/ES Cell Shared Resource Core. G418 resistant colonies were selected and genotyped by PCR using primers 5'GAAATTCTCAAAGTGCTAAGA3' and 5'CATTATACGAAGTTATTCGAGG3' (3' domain) and primers 5'CCATTTGAAGCATGACCTGC3' and 5'TGTTCAATGGCCGATCCC3' (5' domain). Long-range PCR was used to verify recombination within the 3' and 5' region (data not shown), and Southern blot was used to confirm homologous recombination using a probe to the 3' homology arm (Supplemental Fig 4a). Blastocyst injection was performed by the Vanderbilt Transgenic Mouse/ES Cell Shared Resource Core, with chimeric founders bred to congenic 129SvEvTac mice to generate a congenic 129-

based *Rgs4* conditional knockout line. Recombinant animals were identified by tail PCR using primers 5'TAACCATGTCCTGTTGGAGC3' and 5'GATGTGGAATGTGTGCGAG3', which spanned a 4.6kb region that was deleted in knockout animals. The PCR reaction included: 1ul DNA, 2.5ul 10X PCR buffer with MgCl<sub>2</sub>, 2ul dNTP (2.5mM), 0.5ul of each primer, 0.25ul of Amplitaq Gold, and 18.25ul of water. PCR conditions were as follows: 5 minutes at 94°C, followed by 35 cycles that included, 30 seconds at 94°C, 30 seconds at 60°C, and 1 minute at 72°C, and finally an extension step of 10 minutes at 72°C. In the knockout animals, this reaction yielded a product of 644bp. A constitutive *Rgs4* knockout line was generated by breeding to a 129-congenic protamine-CRE (general deleter) line ([www.jax.org](http://www.jax.org), stock # 3328). Heterozygous constitutive nulls were intercrossed to generate control and knockout tissue for microarrays and to confirm loss of *Rgs4* at the protein level. Western blots were performed using protein isolated from three strains of adult mouse frontal cortex, including wild-type mice, mice that over-express *Rgs4* (Ding et al., 2006), and *Rgs4* knockout mice. A polyclonal antibody to *Rgs4* (rabbit anti-*Rgs4*, a kind gift of Dr. Suzanne Mumby, UT Southwestern Medical Center at Dallas) was used at a dilution of 1:2000 (Supplemental Fig 4c). Total RNA was obtained from the frontal cortex of four *Rgs4* knockout adult animals and four wildtype adult animals. Microarrays were performed on Affymetrix MOE430A platform with 22,690 probe sets.

Probe set level data were obtained for all arrays and normalization was performed as described above. We analyzed differential expression between both mutants and wildtype using the data described above. A Bayesian ANOVA (Baldi and Long, 2001) was used to determine differential expression. Differentially expressed genes (p<0.01) were counted within each module, and the chi-squared test was used to determine significance. To assess whether connectivity within the module itself also has an effect on differential expression, genes were ranked based on their TO with the gene that was deleted. This list was broken into quartiles and the number of differentially expressed genes (p<0.01) for each quartile was counted. The number of differentially expressed genes is expressed as a percentage of the total number of differentially expressed genes. Significance was calculated by

dividing the difference between two percentages by the standard error of the difference and then converting to a p-value.

## References

- Anderson, S.A., Qiu, M., Bulfone, A., Eisenstat, D.D., Meneses, J., Pedersen, R. and Rubenstein, J.L. (1997). Mutations of the homeobox genes *Dlx-1* and *Dlx-2* disrupt the striatal subventricular zone and differentiation of late born striatal neurons.. *Neuron* *19*, 27-37.
- Baldi, P. and Long, A.D. (2001). A Bayesian framework for the analysis of microarray expression data: regularized t -test and statistical inferences of gene changes.. *Bioinformatics* *17*, 509-519.
- Barabási, A. and Oltvai, Z.N. (2004). Network biology: understanding the cell's functional organization.. *Nat Rev Genet* *5*, 101-113.
- Bolstad, B.M., Irizarry, R.A., Astrand, M. and Speed, T.P. (2003). A comparison of normalization methods for high density oligonucleotide array data based on variance and bias.. *Bioinformatics* *19*, 185-193.
- Choe, S.E., Boutros, M., Michelson, A.M., Church, G.M. and Halfon, M.S. (2005). Preferred analysis methods for Affymetrix GeneChips revealed by a wholly defined control dataset.. *Genome Biol* *6*, R16.
- Ding, J., Guzman, J.N., Tkatch, T. et al. (2006). Rgs4-dependent attenuation of m4 autoreceptor function in striatal cholinergic interneurons following dopamine depletion. *Nat. Neurosci.* **9**: 832-842.
- Dong, J. and Horvath, S. (2007). Understanding network concepts in modules.. *BMC Syst Biol* *1*, 24.
- Eisen, M.B., Spellman, P.T., Brown, P.O. and Botstein, D. (1998). Cluster analysis and display of genome-wide expression patterns.. *Proc Natl Acad Sci U S A* *95*, 14863-14868.
- Horvath, S., Zhang, B., Carlson, M., Lu, K.V., Zhu, S., Felciano, R.M., Laurance, M.F., Zhao, W., Qi, S., Chen, Z., et al. (2006). Analysis of oncogenic signaling networks in glioblastoma identifies ASPM as a molecular target.. *Proc Natl Acad Sci U S A* *103*, 17402-17407.
- Langfelder, P., Zhang, B. and Horvath, S. (2008). Defining clusters from a hierarchical cluster tree: the dynamic tree cut package for R. *Bioinformatics* **24**: 719-720.
- Li, A. and Horvath, S. (2007). Network neighborhood analysis with the multi-node topological overlap measure.. *Bioinformatics* *23*, 222-231.
- Oldham, M.C., Horvath, S. and Geschwind, D.H. (2006). Conservation and evolution of gene coexpression networks in human and chimpanzee brains.. *Proc Natl Acad Sci U S A* *103*, 17973-17978.
- Ravasz, E., Somera, A.L., Mongru, D.A., Oltvai, Z.N. and Barabási, A.L. (2002). Hierarchical organization of modularity in metabolic networks.. *Science* *297*, 1551-1555.
- Yip, A.M. and Horvath, S. (2007). Gene network interconnectedness and the generalized topological overlap measure.. *BMC Bioinformatics* *8*, 22.
- Zhang, B. and Horvath, S. (2005). A general framework for weighted gene co-expression network analysis.. *Stat Appl Genet Mol Biol* *4*, Article17.

## Supplemental Figures

### a) Summary of neuronal sub-types

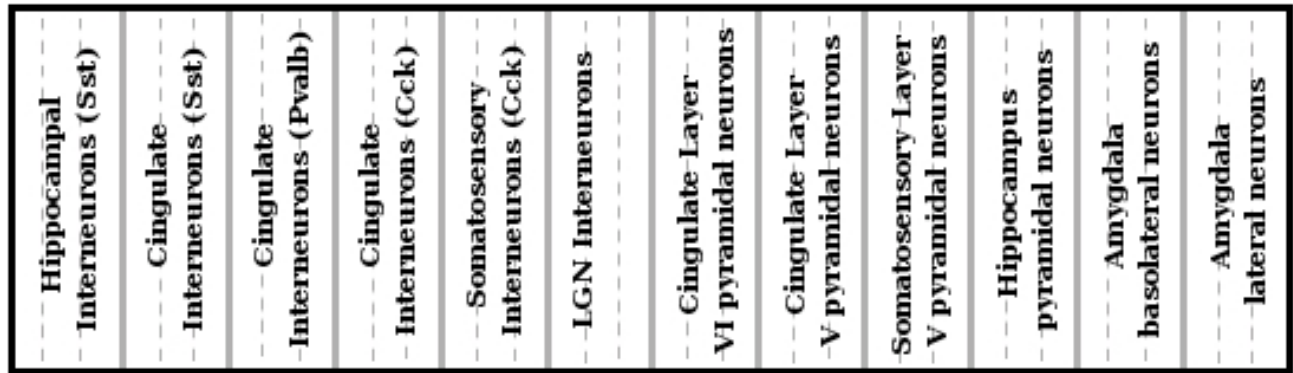

### b) Black (#1)

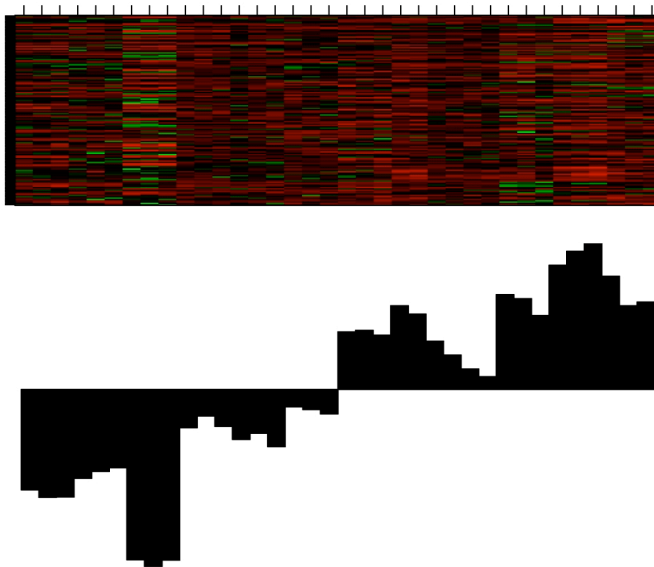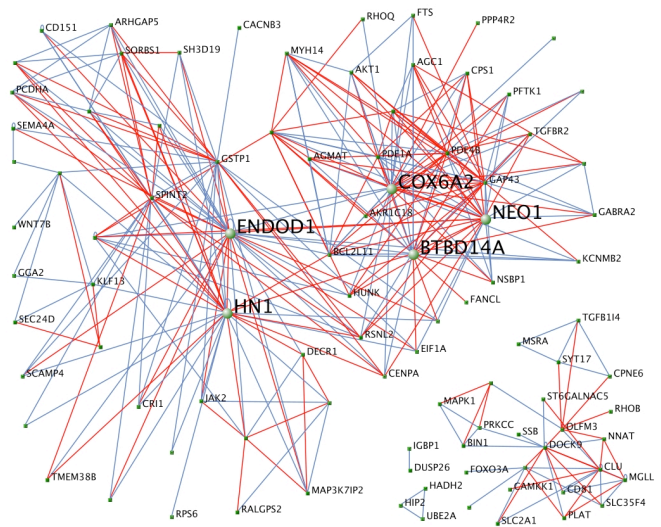

c) Blue (#2)

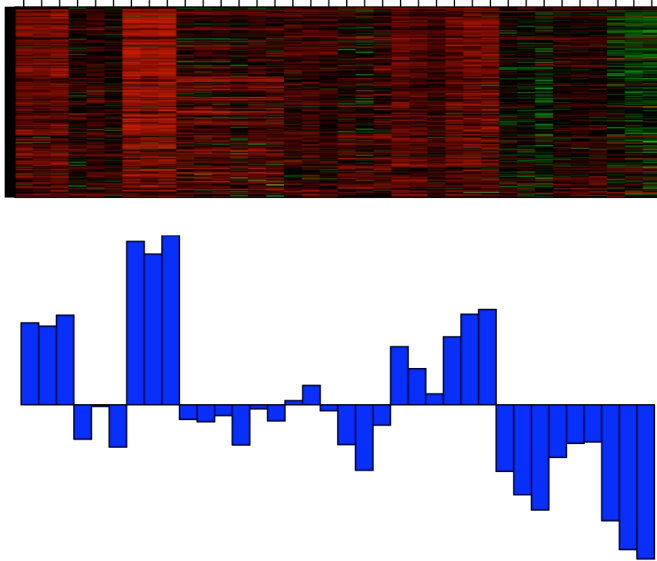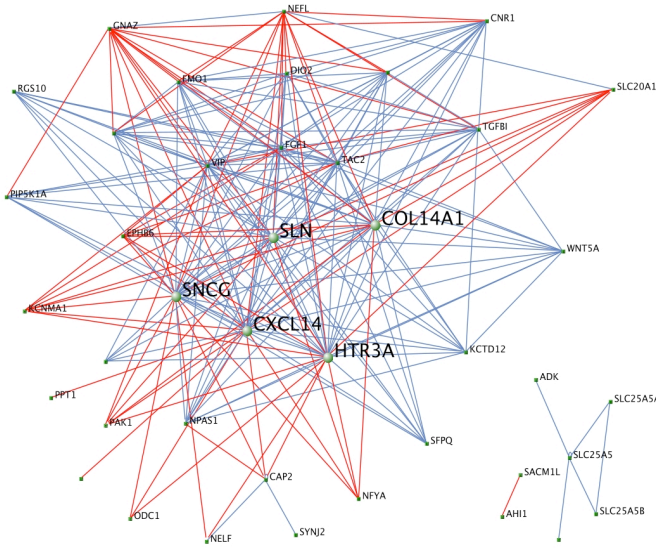

d) Brown (#3)

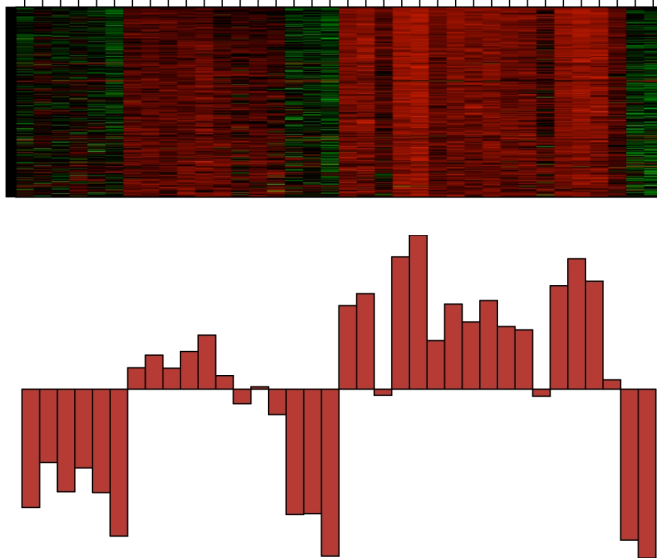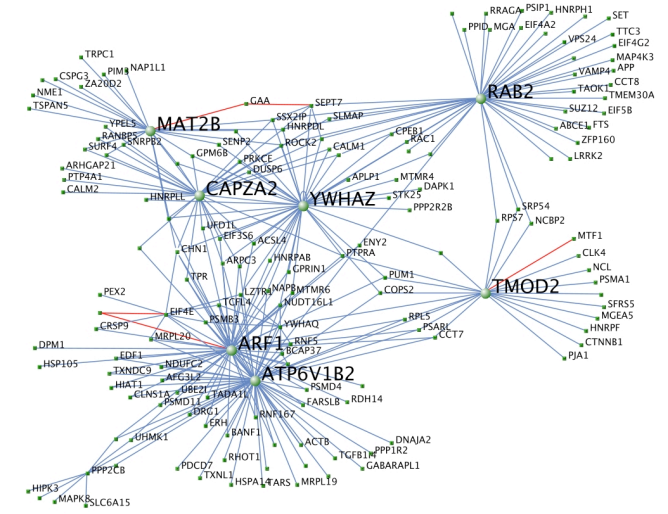



e) Green (#4)

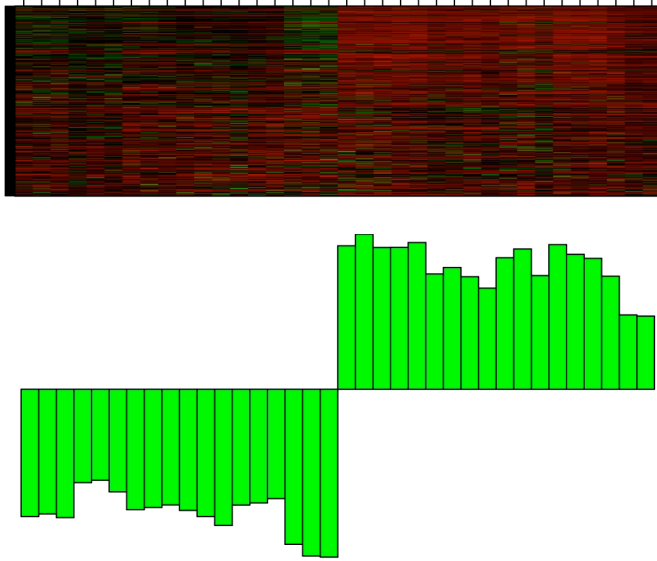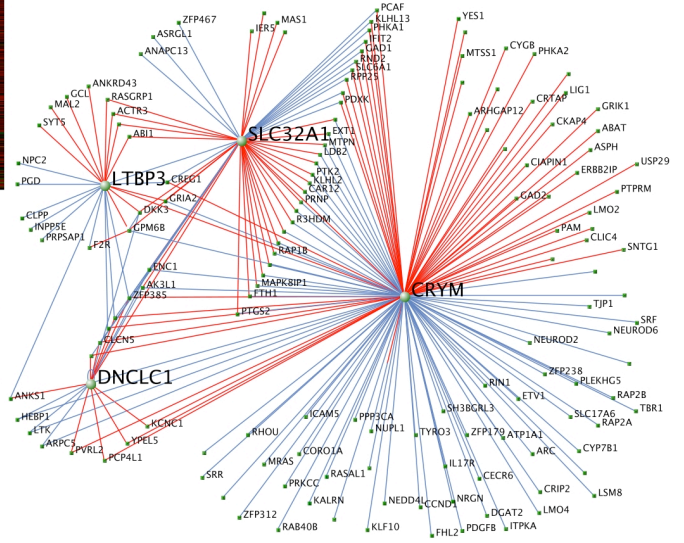

f) Green yellow (#5)

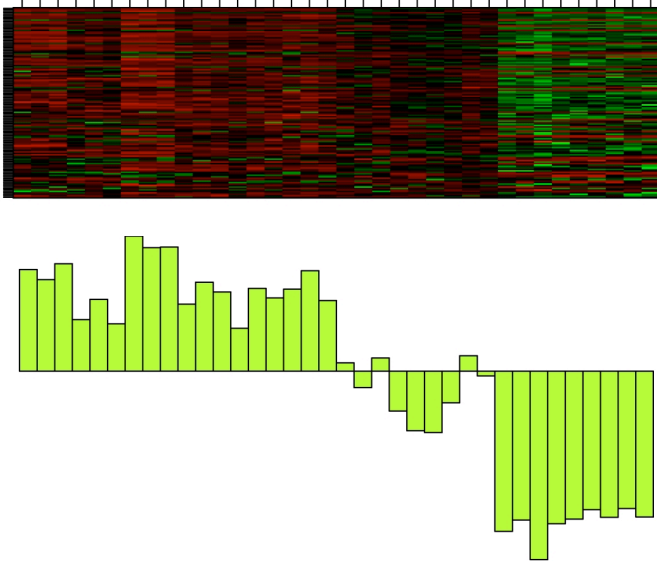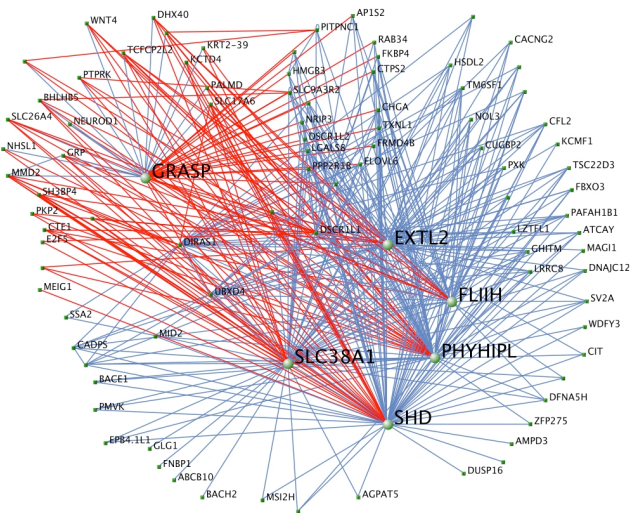

g) Light yellow (#6)

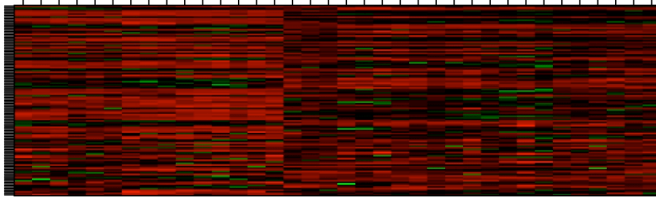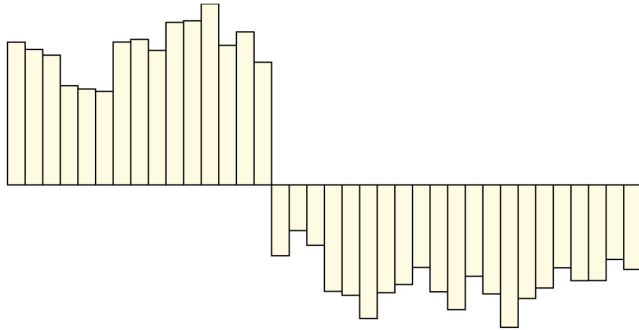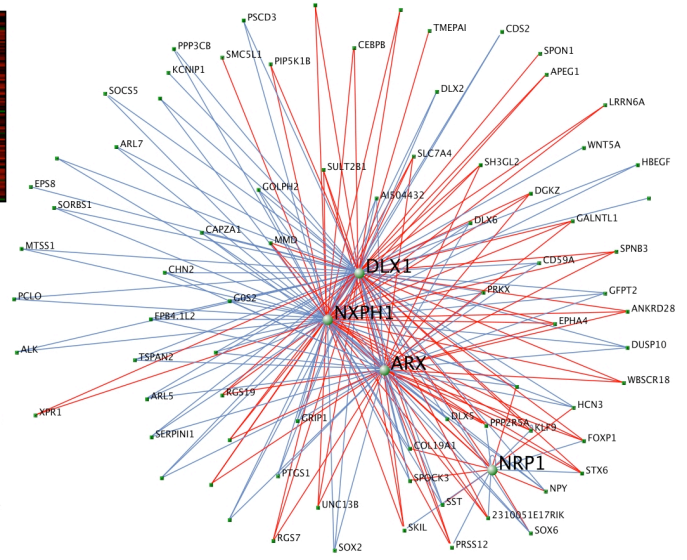

h) Midnight blue (#7)

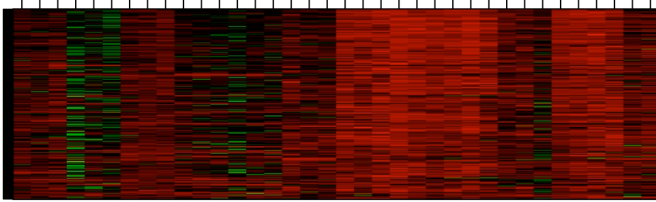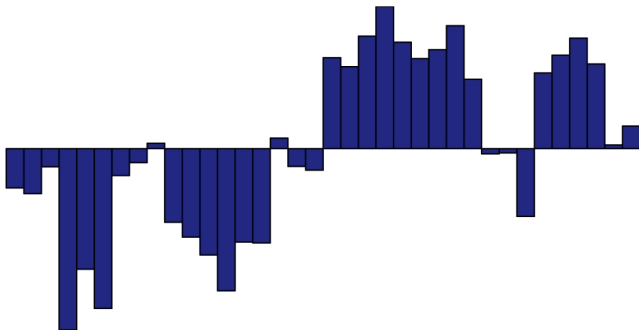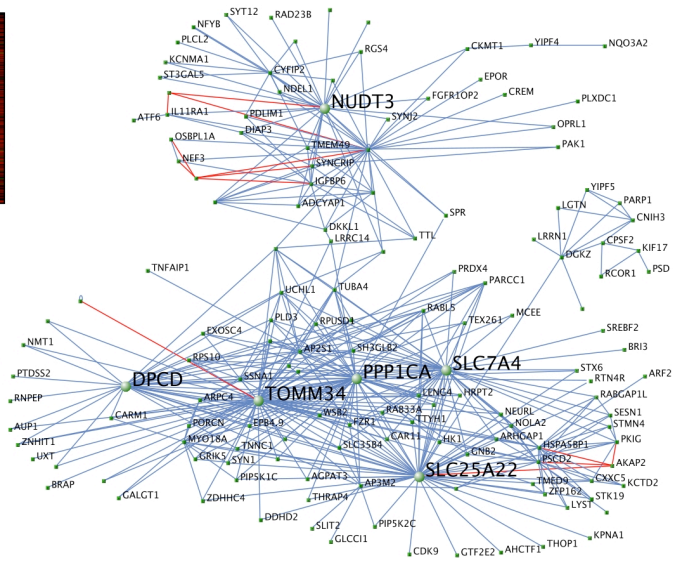

i) Orange (#8)

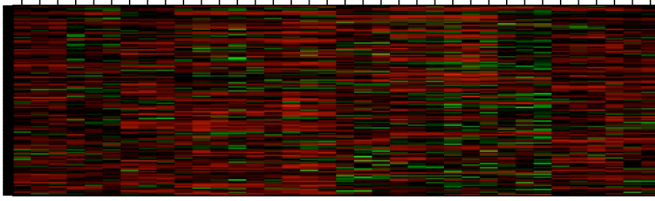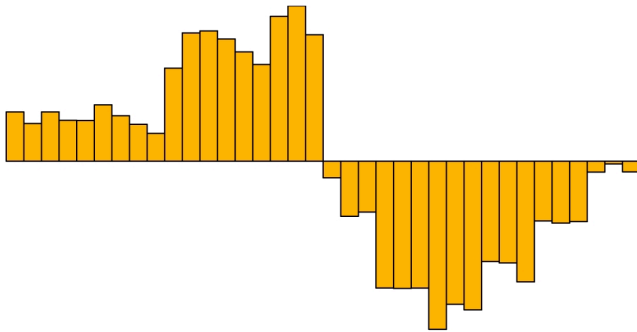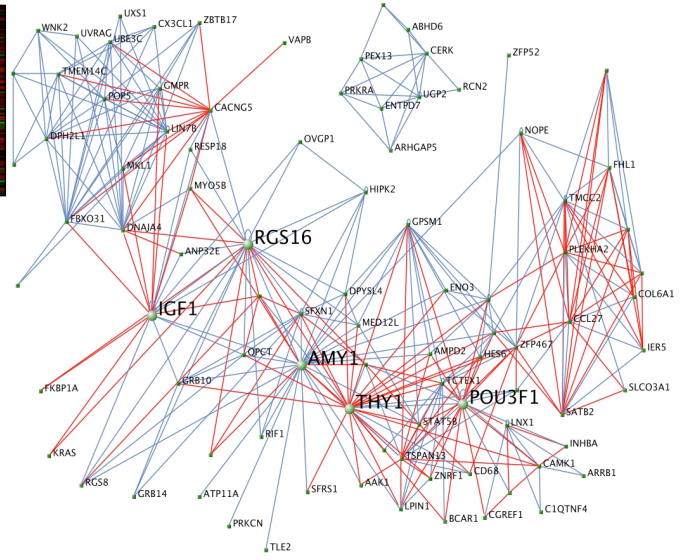

j) Pink (#9)

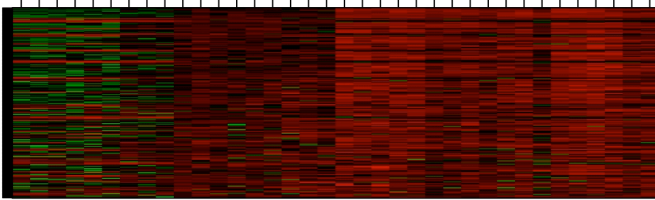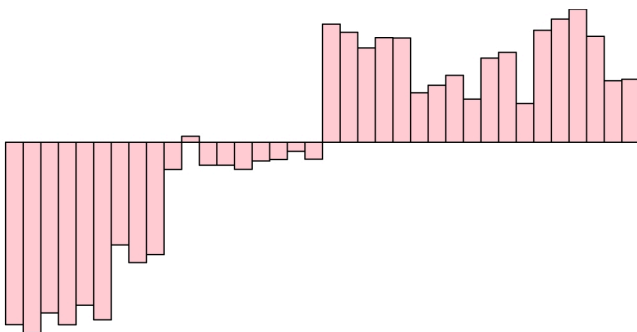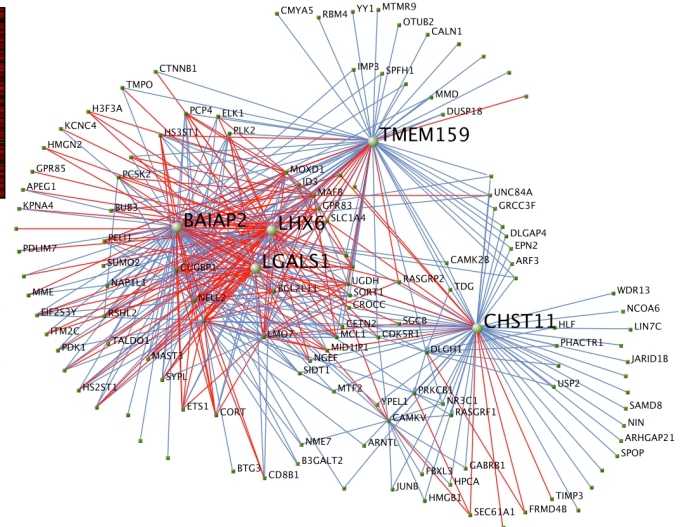



k) Purple (#10)

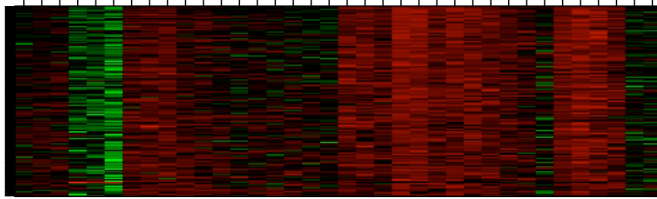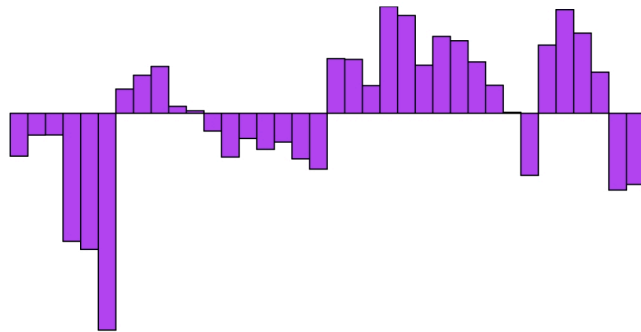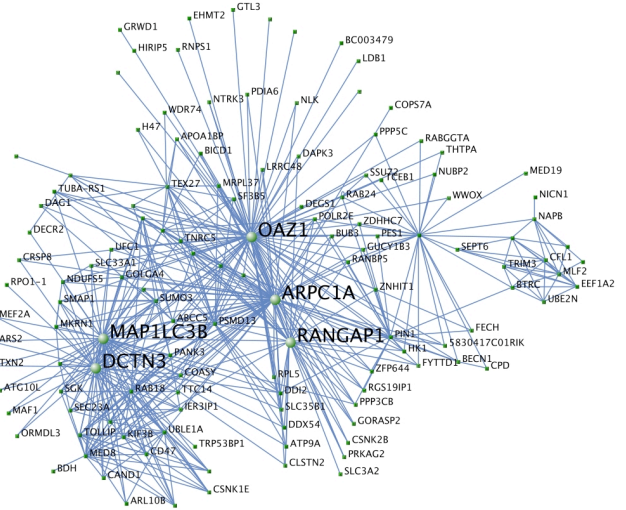

l) Red (#11)

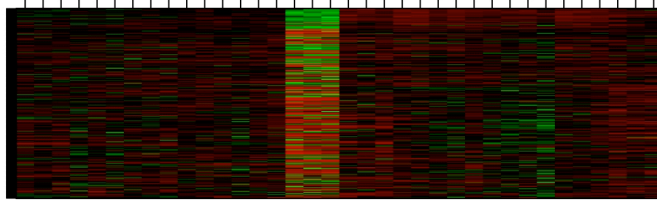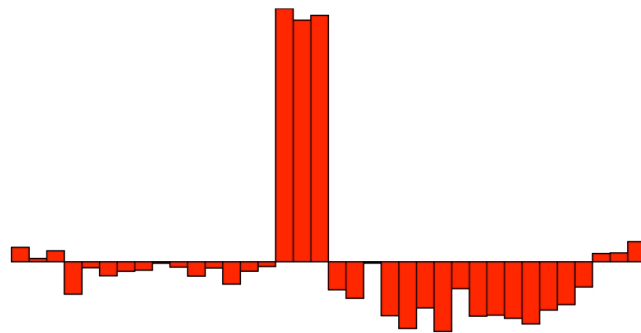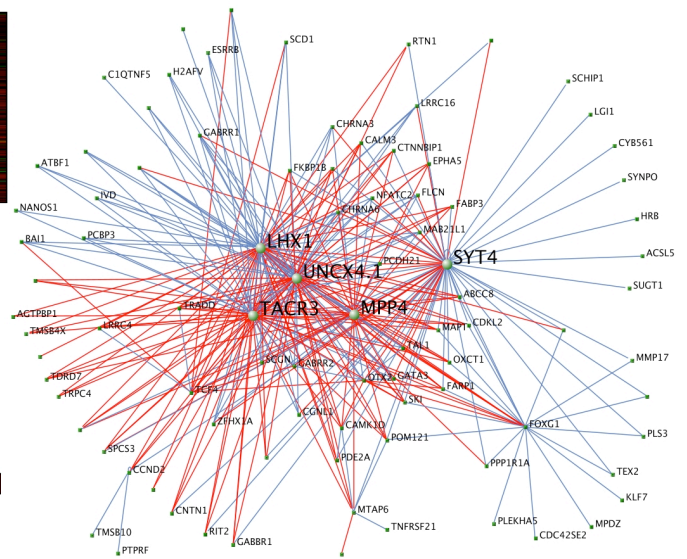

m) Turquoise (#12)

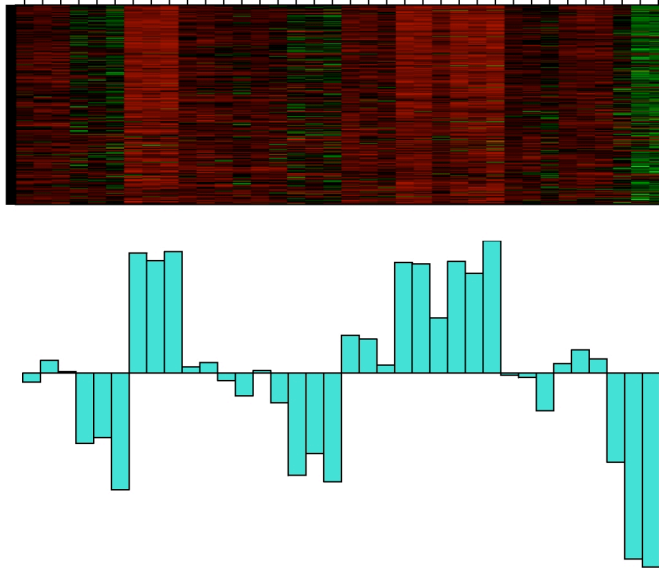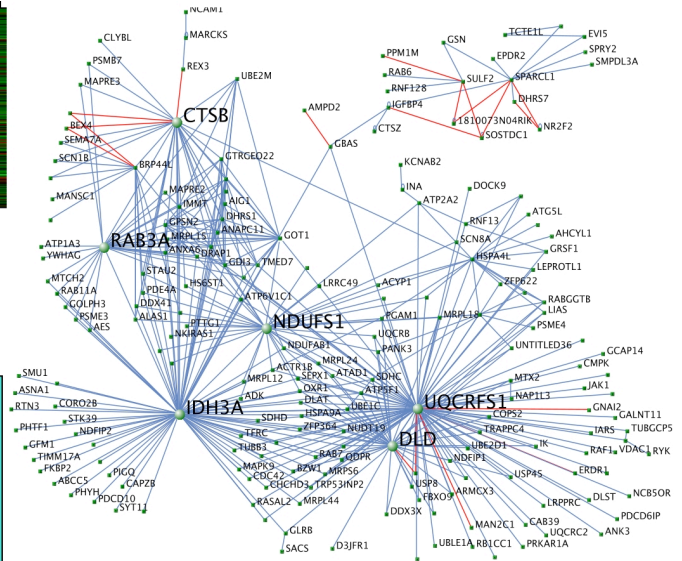

n) Yellow (#13)

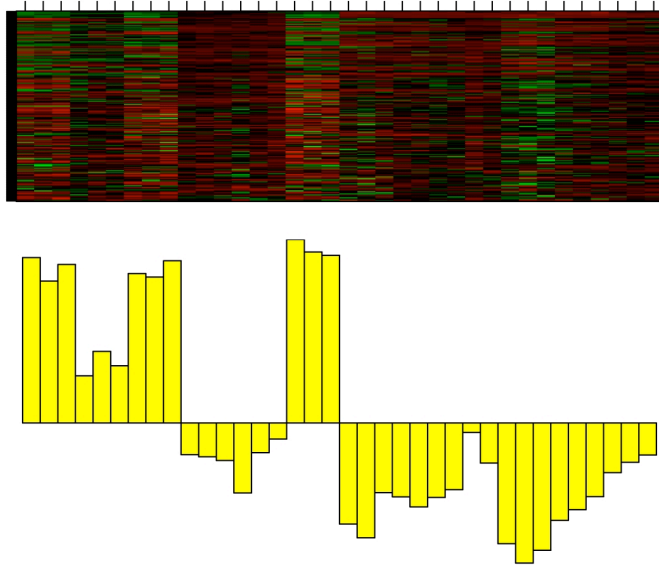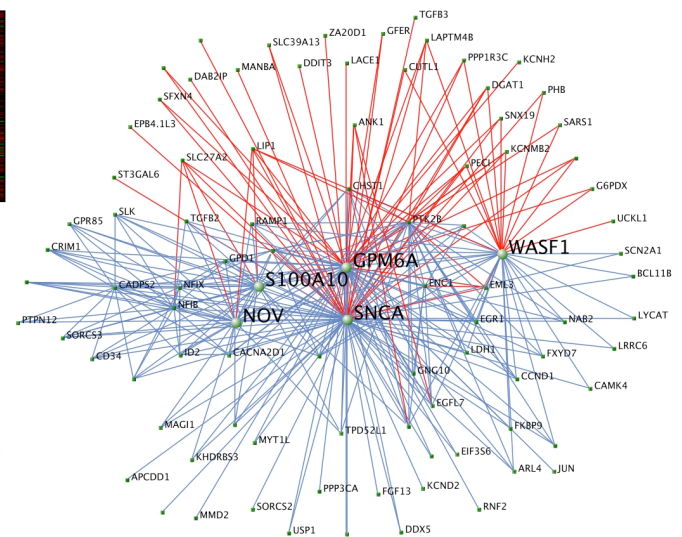

**Supplemental Figure 1:** Gene expression patterns within modules – Heat maps depicting expression of genes (rows) across all samples (columns) are shown for all modules. Within the heat map, red corresponds to high expression, whereas green corresponds to genes that are expressed at a low level. Below each heat map, a barplot of the module eigengene (ie. first principal component) derived from singular value decomposition summarizes gene expression within the module. a) A map of the different neuronal sub-types across the heat maps is located in the upper left. b) The black (#1) module contains 144 genes and corresponds to hippocampal, basolateral amygdala, and lateral amygdala

pyramidal neurons. The network plot to the right displays the top three hundred connections within the module. c) The blue (#2) module contains 252 genes and corresponds hippocampal somatostatin-positive and cingulate parvalbumin interneurons, as well as layer 5 somatosensory pyramidal neurons. d) The brown (#3) module contains 342 genes and corresponds to layer 5 & 6 cingulate, layer 5 somatosensory, hippocampal, and basolateral amygdala pyramidal neurons . e) The green (#4) module contains 419 genes and corresponds to all excitatory neurons. f) The green yellow (#5) modules contains 130 genes and corresponds to all inhibitory neurons. g) The light yellow (#6) module contains 121 genes and corresponds to inhibitory interneurons derived from the telencephalon. h) The midnight blue (#7) module contains 234 genes and corresponds to layer 5 &6 cingulate, layer 5 somatosensory, and basolateral amygdala pyramidal neurons. i) The orange (#8) module contains 139 genes and corresponds to cingulate cholecystokinin-positive, somatosensory cholecystokinin-positive, and LGN interneurons. j) The pink (#9) module contains 249 genes and corresponds to all excitatory neurons. k) The purple (#10) module contains 143 genes and corresponds to layer 5 & 6 cingulate, layer 5 somatosensory, and basolateral amygdala pyramidal neurons. l) The red (#11) module contains 263 genes and corresponds to LGN interneurons. m) The turquoise (#12) module contains 358 genes and corresponds to cingulate parvalbumin-positive interneurons, as well as layer 5 cingulate and layer 5 somatosensory pyramidal neurons. n) The yellow (#13) module contains 189 genes and corresponds to hippocampal somatostatin-positive, cingulate parvalbumin-positive, and LGN interneurons.

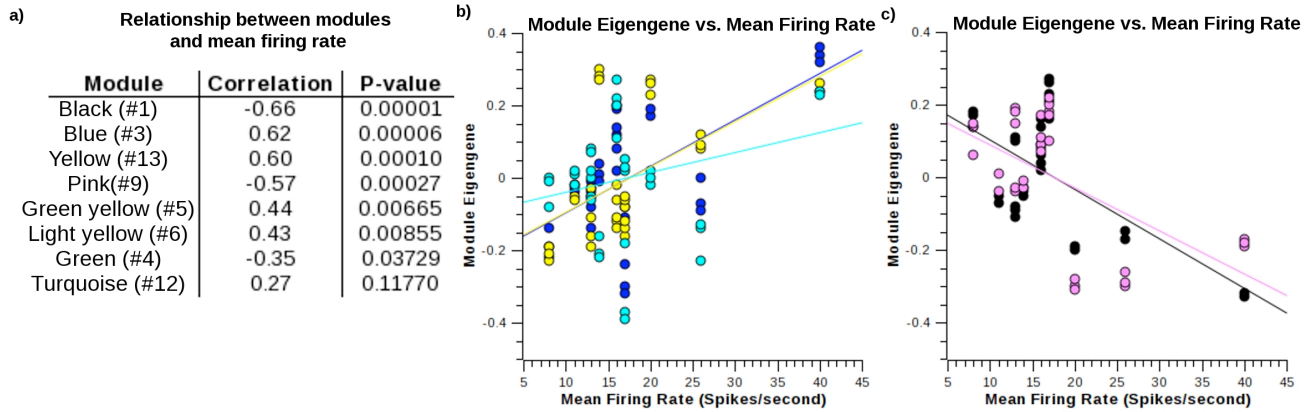

**Supplemental Figure 2: Modules correspond to firing rate** – Mean firing rate of each cell type was derived from current clamp data presented in Sugino et al., (2006) Figure 1 (see Methods). Firing rate was compared to each module eigengene using a Pearson correlation to assess whether any modules were related to physiological activity. a) Summary of the Pearson correlation and p-value for each comparison of module eigengene and firing rate. Only the data from modules that had nominally significant correlations ( $p < 0.05$ ) with firing rate and the turquoise module are shown. Of these, four modules showed significant correlation with firing rate after Bonferroni correction (Blue (#2), Yellow (#13), Pink (#9), and Black (#1)), while the other modules did not. b) This scatter plot shows the relationship of firing rate to the module eigengenes for the blue (#2), yellow (#13), and turquoise (#12) modules. The blue (#2) and yellow (#13) module eigengenes are significantly positively correlated with firing rate ( $p = 6.2 \times 10^{-5}$  &  $1.0 \times 10^{-4}$ ), but the turquoise (#12) module is not ( $p = 0.12$ ). c) This scatter plot shows that the pink (#9) and black (#1) module eigengenes are significantly inversely correlated with firing rate ( $p = 2.7 \times 10^{-5}$  &  $p = 1.0 \times 10^{-6}$ ).

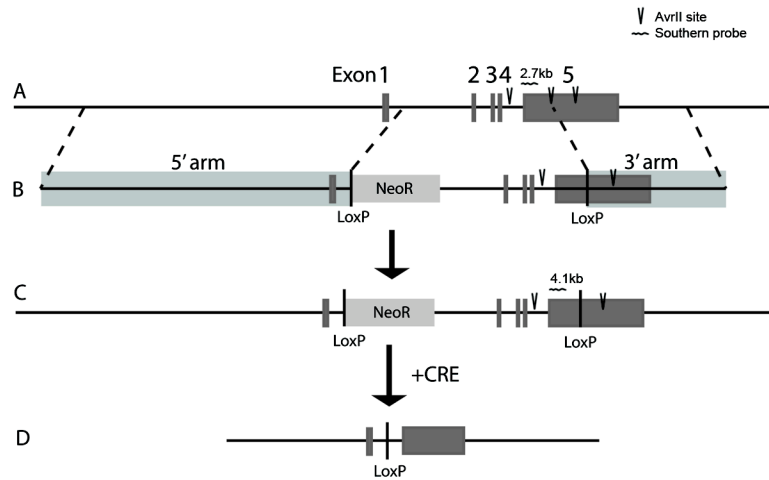

**Supplemental Figure 3: Construction of *Rgs4* targeting vector** – A schematic describing the targeting vector used to create the *Rgs4* knockout mouse. a) Genomic structure of *Rgs4*. The *Rgs4* coding sequence extends across all 5 transcribed exons, spanning approximately 10 kb. b) *Rgs4* conditional knockout targeting construct. The *Rgs4* KO construct introduces a LoxP site and an FRT-flanked neomycin-resistance cassette into intron 1 of the *Rgs4* gene as well as a LoxP site into the middle of exon 5 (FRT sites are removed for simplicity in this figure). This effectively excises all but the first 15 amino acids of *Rgs4* (encoded by exon 1). c) *Rgs4* conditional knockout construct integrated into the *Rgs4* genomic locus. d) *Rgs4* locus after mouse is mated to a CRE-expressing mouse. Exons 2-4 and the 5' region of exon 5 are removed, leaving only exon 1 and the 3' region of exon 5. The AvrII sites and southern probe were used to confirm homologous recombination at the 3' end, which is described in detail in Supplemental Figure 4.

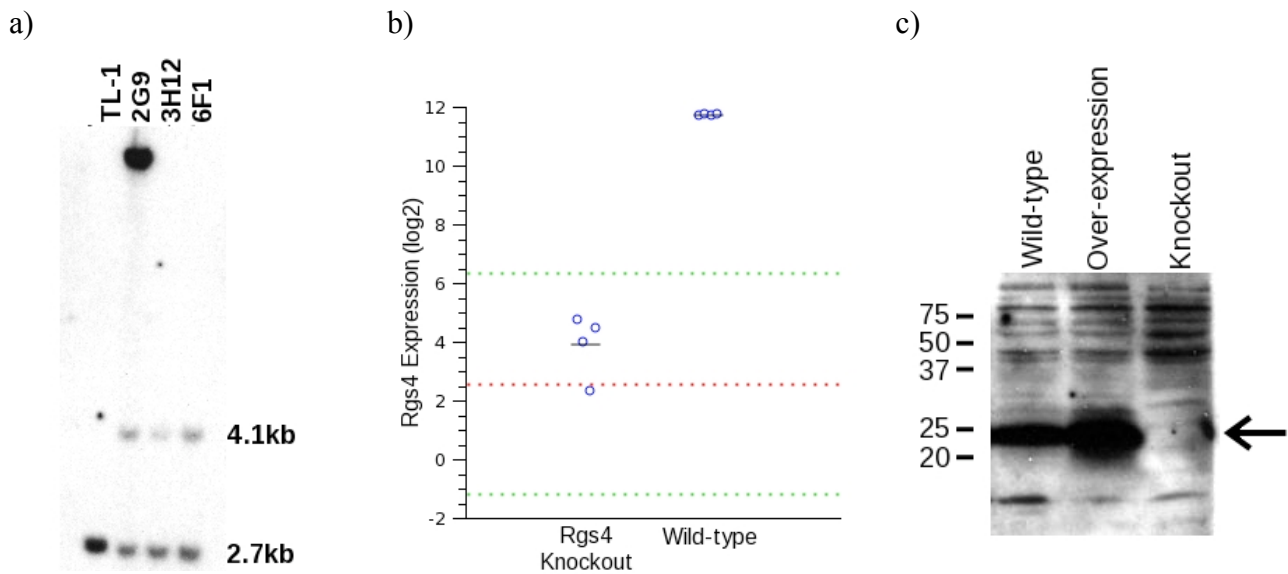

**Supplemental Figure 4: Confirmation of *Rgs4* deletion** – Verification of disruption of *Rgs4* on the DNA, mRNA, and protein levels. a) Homologous recombination of the targeting vector in the 3' homology region was verified by Southern blot. TL-1 represents the parent stem cell line that was used for the *Rgs4* targeting event, and 2G9, 3H12, and 6F1 were the only clones obtained after injection of the targeting vector and selection with G418. The *Rgs4* locus has two *AvrII* sites, immediately 5' and 3' to the 3' homology arm (see Supplemental Fig 3), but the 3' *AvrII* site was mutated during the introduction of the *LoxP* site. The probe is located 3' of the 3' *AvrII* site, and therefore, the parent cell line only shows a smaller band at 2.7kb, which demonstrates that the 3' *AvrII* site is intact. In all three clones (2G9, 3H12, and 6F1), we observed a larger band at 4.1kb, which shows that the 3' *AvrII* site is absent but the 5' *AvrII* site is present, confirming the presence of the second *LoxP* site because it is located between these restriction sites. Clone 2G9 had additional insertions evidenced by the large band at the top, and therefore, we used clone 3H12 for the generation of transgenic mice. b) Microarray data showing the expression of *Rgs4* in the knockout and wild-type frontal cortex. The blue circles show the individual data points for *Rgs4* expression, and the black horizontal bar denotes the mean expression. The red dashed line displays the mean expression for all absent genes, and the green

dashed line shows two standard deviations of expression for all absent genes. *Rgs4* is highly expressed in the wild-type mice, but expression values are similar to genes that are called absent in the knockout animals, further confirming disruption of *Rgs4*. c) Western blot of protein extracts from frontal cortex of wild-type mice, mice that over-express *Rgs4* (Ding et al., 2006), and knockout mice of *Rgs4* using an anti-*Rgs4* antibody (see Supplemental Methods). *Rgs4* is a 24kDa protein, and the arrow denotes position of *Rgs4* protein in the wild-type and over-expression mice. Note the absence of *Rgs4* protein in the knockout strain.

## Supplemental Tables

**Supplemental Table 1 - Summary of all neuronal classes used in the analysis**

| Array    | Tissue        | Neuro-transmitter | Peptide/ Location | Strain  | Average correlation | Standard deviation |
|----------|---------------|-------------------|-------------------|---------|---------------------|--------------------|
| GSM63015 | Hippocampus   | GABA              |                   | GIN     | 0.911               | 0.021              |
| GSM63016 | Hippocampus   | GABA              |                   | GIN     | 0.912               | 0.021              |
| GSM63017 | Hippocampus   | GABA              |                   | GIN     | 0.914               | 0.021              |
| GSM63018 | Cingulate     | GABA              | Sst               | GIN     | 0.897               | 0.021              |
| GSM63019 | Cingulate     | GABA              | Sst               | GIN     | 0.907               | 0.020              |
| GSM63020 | Cingulate     | GABA              | Sst               | GIN     | 0.900               | 0.021              |
| GSM63021 | Cingulate     | GABA              | Pvalb             | G42     | 0.915               | 0.020              |
| GSM63022 | Cingulate     | GABA              | Pvalb             | G42     | 0.912               | 0.020              |
| GSM63023 | Cingulate     | GABA              | Pvalb             | G42     | 0.915               | 0.020              |
| GSM63024 | Cingulate     | GABA              | Cck               | G30     | 0.917               | 0.018              |
| GSM63025 | Cingulate     | GABA              | Cck               | G30     | 0.912               | 0.020              |
| GSM63026 | Cingulate     | GABA              | Cck               | G30     | 0.915               | 0.019              |
| GSM63027 | Somatosensory | GABA              | Cck               | G30     | 0.905               | 0.020              |
| GSM63028 | Somatosensory | GABA              | Cck               | G30     | 0.918               | 0.018              |
| GSM63029 | Somatosensory | GABA              | Cck               | G30     | 0.911               | 0.019              |
| GSM63030 | LGN           | GABA              |                   | G42     | 0.901               | 0.021              |
| GSM63031 | LGN           | GABA              |                   | G42     | 0.903               | 0.021              |
| GSM63032 | LGN           | GABA              |                   | G42     | 0.899               | 0.022              |
| GSM63033 | Cingulate     | Glutamate         | Layer VI          | C57/Bl6 | 0.915               | 0.021              |
| GSM63034 | Cingulate     | Glutamate         | Layer VI          | C57/Bl6 | 0.912               | 0.022              |
| GSM63035 | Cingulate     | Glutamate         | Layer VI          | C57/Bl6 | 0.915               | 0.020              |
| GSM63036 | Cingulate     | Glutamate         | Layer V           | YFPH    | 0.923               | 0.024              |
| GSM63037 | Cingulate     | Glutamate         | Layer V           | YFPH    | 0.923               | 0.024              |
| GSM63038 | Cingulate     | Glutamate         | Layer V           | YFPH    | 0.920               | 0.022              |
| GSM63039 | Somatosensory | Glutamate         | Layer V           | YFPH    | 0.915               | 0.024              |
| GSM63040 | Somatosensory | Glutamate         | Layer V           | YFPH    | 0.917               | 0.021              |
| GSM63041 | Somatosensory | Glutamate         | Layer V           | YFPH    | 0.916               | 0.022              |
| GSM63042 | Hippocampus   | Glutamate         |                   | YFPH    | 0.916               | 0.024              |
| GSM63043 | Hippocampus   | Glutamate         |                   | YFPH    | 0.911               | 0.024              |
| GSM63044 | Hippocampus   | Glutamate         |                   | YFPH    | 0.905               | 0.024              |
| GSM63045 | Amygdala      | Glutamate         | Basolateral       | YFPH    | 0.920               | 0.024              |
| GSM63046 | Amygdala      | Glutamate         | Basolateral       | YFPH    | 0.920               | 0.024              |
| GSM63047 | Amygdala      | Glutamate         | Basolateral       | YFPH    | 0.920               | 0.024              |
| GSM63048 | Amygdala      | Glutamate         | Lateral           | G30     | 0.913               | 0.021              |
| GSM63049 | Amygdala      | Glutamate         | Lateral           | G30     | 0.908               | 0.020              |
| GSM63050 | Amygdala      | Glutamate         | Lateral           | G30     | 0.906               | 0.020              |

This table summarizes the different classes of neurons, which were included in the analysis. The first column corresponds to the array names from Geo DataSets. The tissue describes where the neurons were obtained from, and the neurotransmitter column describes the main neurotransmitter of the isolated neurons. The peptide/location column describes a distinguishing characteristic, which differentiates it from the rest of the populations. The strain corresponds to the mouse strain that the neurons were obtained from. The average correlation and standard deviation describe the correlations with all of the other arrays in the data set.



**Supplemental Table 2 - Summary of GO analysis for each module**

| <b>Module</b>      | <b>Biological Process</b>                                                                                                                                    | <b>Cellular Compartment</b>                                              | <b>Molecular Function</b>                                                                                            |
|--------------------|--------------------------------------------------------------------------------------------------------------------------------------------------------------|--------------------------------------------------------------------------|----------------------------------------------------------------------------------------------------------------------|
| Black (#1)         | -Cellular protein metabolism (p=0.0012)<br>-Small GTPase mediated signal transduction (p=0.0041)<br>-Protein transport (p=0.029)                             | -Chromatin (p=0.017)<br>-Chromosome (p=0.049)                            | -Protein kinase activity (p=0.016)<br>-GTP binding (p=0.017)<br>-Sugar porter activity (p=0.021)                     |
| Blue (#2)          | -Carboxylic acid metabolism (p=1.2e-4)<br>-Cellular carbohydrate metabolism (p=0.0036)<br>-Electron transport (p=0.0048)                                     | -Mitochondrion (p=1.86e-6)                                               | -Voltage-gated channel activity (p=0.0015)<br>-FGF receptor binding (p=0.0022)<br>-Hyaluronic acid binding (p=0.015) |
| Brown (#3)         | -Protein transport (p=2.1e-6)<br>-Establishment of cellular localization (p=2.8e-4)<br>-RNA metabolism (p=0.0016)                                            | -Nucleus (p=4.6e-4)<br>-Spliceosome complex (p=0.036)                    | -ATP binding (p=1.3e-4)<br>-Ubiquitin-protein ligase activity (p=2.6e-3)<br>-Protein kinase activity (p=0.012)       |
| Green(#4)          | -Synaptic transmission (p=3.7e-4)<br>-Axon guidance (p=0.0084)<br>-Neuron differentiation (p=0.011)                                                          | -Cytoskeleton (p=0.021)                                                  | -GTP binding (p=4.1e-4)<br>-Protein kinase activity (p=0.026)                                                        |
| Green yellow (#5)  | -Oogenesis (p=0.063)<br>-Neuroblast proliferation (p=0.078)                                                                                                  | -Cytoskeleton (p=0.063)                                                  | -ATP binding (p=0.084)                                                                                               |
| Light yellow (#6)  | -Synaptic vesicle transport (p=0.0053)<br>-Cell migration (p=0.026)<br>-Neuron differentiation (p=0.031)                                                     | -Transcription factor complex (p=0.069)<br>-Actin cytoskeleton (p=0.079) | -Potassium ion binding (p=0.078)                                                                                     |
| Midnight blue (#7) | -Intracellular transport (p=0.0041)<br>-Neuron morphogenesis during differentiation (p=0.0053)<br>-Cytoskeleton-dependent intracellular transport (p=0.0066) | -Coated vesicle (p=0.0035)<br>-Golgi apparatus (p=0.034)                 | -GTP binding (p=0.054)<br>-Acytransferase activity (p=0.089)                                                         |
| Orange (#8)        | -Apoptosis (p=0.009)<br>-Negative regulation of axonogenesis (p=0.046)<br>-Neuron differentiation (p=0.052)                                                  |                                                                          | -Protein kinase activity (p=0.021)<br>-ATP binding (p=0.093)                                                         |
| Pink (#9)          | -Small GTPase mediated signal transduction (p=0.0085)<br>-Protein transport (p=0.0098)<br>-Transcription (p=0.015)                                           | -Nucleus (p=0.02)<br>-Golgi stack (p=0.04)                               | -Protein kinase activity (p=0.0029)<br>-Protein histidine kinase activity (p=0.033)                                  |
| Purple (#10)       | -Wnt receptor signaling pathway (p=0.0038)<br>-Cellular protein metabolism (p=0.011)<br>-Ribosome biogenesis and assembly (p=0.035)                          | -Endoplasmic reticulum (p=0.0091)<br>-Signalosome complex (p=0.08)       | -GTP binding (p=0.037)<br>-ATP binding (p=0.053)                                                                     |
| Red (#11)          | -Lipid biosynthesis (p=0.0054)<br>-Negative regulation of programmed cell death (p=0.039)<br>-Synaptic transmission (p=0.076)                                | -Nuclear chromosome (p=0.064)<br>-Microtubule cytoskeleton (p=0.01)      | -GABA-A receptor activity (p=0.005)<br>-Zinc ion binding (p=0.034)                                                   |
| Turquoise (#12)    | -Cellular carbohydrate metabolism (p=4.5e-4)<br>-Cell projection biogenesis (p=0.019)<br>-Synaptic transmission (p=0.026)                                    | -Mitochondrion (p=2.5e-11)<br>-Microtubule cytoskeleton (p=0.01)         | -ATPase activity (p=0.014)<br>-GTP binding (p=0.021)                                                                 |
| Yellow (#13)       | -Ion transport (p=5.7e-4)<br>-Nucleocytoplasmic transport (p=0.012)<br>-Nucleobase, nucleoside, and nucleotide transport (p=0.038)                           | -Lytic vacuole (p=0.043)                                                 | -Voltage-gated channel activity (p=0.029)<br>-Protein kinase activity (p=0.035)                                      |

This table summarizes selected GO categories for each module. The columns represent categories in biological process, cellular compartment, and molecular function. Only level five GO categories were used. Terms were selected on the basis of uniqueness and over-representation, but each category was limited to maximum three terms per module.

**Supplemental Table 3 - Summary of the modules and their significance**

| <b>Module Eigengene</b> | <b>Corresponding Cell Types</b>                                                                                             |
|-------------------------|-----------------------------------------------------------------------------------------------------------------------------|
| Black (#1)              | Hippocampal, Basolateral amygdala, and Lateral Amygdala pyramidal neurons                                                   |
| Blue (#2)               | Hippocampal (Sst+) and Cingulate (Pvalb+) interneurons; Somatosensory (Layer 5) pyramidal neurons                           |
| Brown (#3)              | Cingulate (Layer 5 & 6), Somatosensory (Layer 5), Hippocampal, and Basolateral amygdala pyramidal neurons                   |
| Green (#4)              | Cingulate (Layer 5 & 6), Somatosensory (Layer 5), Hippocampal, Basolateral amygdala, and Lateral amygdala pyramidal neurons |
| Green yellow (#5)       | Hippocampal (Sst+), Cingulate (Pvalb+/Sst+/Cck+), Somatosensory (Cck+) and LGN interneurons                                 |
| Light yellow (#6)       | Hippocampal (Sst+), Cingulate (Pvalb+/Sst+/Cck+), and Somatosensory (Cck+) interneurons                                     |
| Midnight blue (#7)      | Cingulate (Layer 5 & 6), Somatosensory (Layer 5), and Basolateral amygdala pyramidal neurons                                |
| Orange (#8)             | Cingulate (Cck+), Somatosensory (Cck+) and LGN interneurons                                                                 |
| Pink (#9)               | Cingulate (Layer 5 & 6), Somatosensory (Layer 5), Hippocampal, Basolateral amygdala, and Lateral amygdala pyramidal neurons |
| Purple (#10)            | Cingulate (Layer 5 & 6), Somatosensory (Layer 5), and Basolateral amygdala pyramidal neurons                                |
| Red (#11)               | LGN interneurons                                                                                                            |
| Turquoise (#12)         | Cingulate (Pvalb+) interneurons; Cingulate (Layer 5) and Somatosensory (Layer 5) pyramidal neurons                          |
| Yellow (#13)            | Hippocampal (Sst+), Cingulate (Pvalb+) and LGN interneurons                                                                 |

A table of the different modules and their associated cell types. Each of the module eigengenes was inspected for those cell types that had high expression of the genes within the module. The module eigengene was compared to these patterns using an indicator vector (1-for types with high expression; 0-for types with low expression), and significance was determined using the Kruskal-Wallis test. All modules were significantly associated with these cell types ( $p < 0.004$ ).

**Supplemental Table 4 - Comparison between module correspondence to strain and cell identity**

| <b>Module</b>      | <b>GIN</b> | <b>G42</b> | <b>G30</b> | <b>YFPH</b> | <b>C57/B16</b> | <b>Cell Identity</b> |
|--------------------|------------|------------|------------|-------------|----------------|----------------------|
| Black (#1)         | 0.4705     | 0.4828     | 0.0224     | 0.6206      | 0.1919         | 0.6822               |
| Blue (#2)          | 0.1622     | 0.4723     | 0.4195     | 0.0227      | 0.1597         | 0.8011               |
| Brown (#3)         | 0.4986     | 0.2720     | 0.1671     | 0.6533      | 0.1866         | 0.6901               |
| Green (#4)         | 0.3945     | 0.4990     | 0.2356     | 0.7171      | 0.3509         | 0.9847               |
| Green yellow (#5)  | 0.3497     | 0.4716     | 0.0034     | 0.6555      | 0.0052         | 0.8524               |
| Light yellow (#6)  | 0.4420     | 0.1560     | 0.3650     | 0.6321      | 0.3000         | 0.9798               |
| Midnight blue (#7) | 0.4795     | 0.0550     | 0.3567     | 0.5587      | 0.3266         | 0.8022               |
| Orange (#8)        | 0.2144     | 0.4195     | 0.4409     | 0.8306      | 0.1289         | 0.7442               |
| Pink (#9)          | 0.7727     | 0.2745     | 0.0731     | 0.5762      | 0.3147         | 0.8416               |
| Purple (#10)       | 0.5946     | 0.0220     | 0.1987     | 0.5571      | 0.1926         | 0.6975               |
| Red (#11)          | 0.0227     | 0.6860     | 0.0208     | 0.4557      | 0.0846         | 0.9501               |
| Turquoise (#12)    | 0.2228     | 0.0551     | 0.3960     | 0.4401      | 0.0959         | 0.7515               |
| Yellow (#13)       | 0.4630     | 0.7067     | 0.2113     | 0.5676      | 0.2780         | 0.8975               |

This table displays the absolute value of the correlations between the module eigengene and genetic strain, as well as populations that had high expression of genes within the module, which is called “Cell Identity.” In order to compare genetic strain and cell type expression to the module eigengenes, both genetic strain and populations with high expression were converted to indicator vectors (eg. 1 for specific strain or population with high expression and 0 for all other populations). These data suggest that with the exception of the orange module, most modules are best described the cell populations with high expression and not strain.

**Supplemental Table 5 – Expression within the black (#1) module using the Allen Brain Atlas**

| Gene Symbol   | Probe        | $k_{ME}$ | Hippocampus | Basolateral Amygdala | Lateral Amygdala |
|---------------|--------------|----------|-------------|----------------------|------------------|
| Plk2          | 1427005_at   | 0.92     | X           | X                    | X                |
| Mast3         | 1435666_at   | 0.91     | X           | X                    | X                |
| Nell2         | 1423561_at   | 0.88     | X           | X                    | X                |
|               | 1422687_at   | 0.88     |             |                      |                  |
| Hn1           | 1448180_a_at | 0.87     | X           | X                    | X                |
| BC008163      | 1425328_at   | 0.87     | X           | X                    | X                |
| Kpna4         | 1417974_at   | 0.87     | X           |                      |                  |
| Spint2        | 1438968_x_at | 0.86     | X           | X                    | X                |
| Neo1          | 1434931_at   | 0.86     | X           | X                    |                  |
| Apeg1         | 1417305_at   | 0.86     | X           | X                    |                  |
| Spfh1         | 1424210_at   | 0.85     | X           | X                    | X                |
| Gng10         | 1450649_at   | 0.85     | X           | X                    |                  |
| Ltk           | 1460300_a_at | 0.84     | X           | X                    |                  |
| Gstp1         | 1449575_a_at | 0.84     | X           | X                    | X                |
| Hn1           | 1438988_x_at | 0.83     | X           | X                    | X                |
| Mmd           | 1423489_at   | 0.83     | X           | X                    | X                |
| Baiap2        | 1451027_at   | 0.83     | X           | X                    | X                |
| Elk1          | 1421897_at   | 0.82     | X           | X                    | X                |
| Snrpg         | 1448358_s_at | 0.82     | X           | X                    | X                |
| 1110033L15Rik | 1453025_at   | 0.82     |             |                      |                  |
| Nap111        | 1420478_at   | 0.81     | X           | X                    | X                |
| D2Bwg0891e    | 1451431_a_at | 0.81     | X           | X                    | X                |
| Rhou          | 1449027_at   | 0.81     | X           |                      |                  |
| Hs2st1        | 1450729_at   | 0.81     | X           | X                    | X                |
| Fanc1         | 1423624_at   | 0.8      |             |                      |                  |

This table displays all of the genes within the black module that were examined using the Allen Brain Atlas. The top twenty-five genes that had their maximum  $k_{ME}$  within the black module were selected, and the gene expression was visually inspected. The module eigengene was used to determine which regions to examine. An (X) within the table denotes presence of expression in that area and a blank cell denotes absence of expression.

**Supplemental Table 6 – Expression within the brown (#3) module using the Allen Brain Atlas**

| Gene Symbol   | Probe        | $k_{ME}$ | Layer V | Basolateral Amygdala |
|---------------|--------------|----------|---------|----------------------|
| Tmod2         | 1431326_a_at | 0.94     | X       | X                    |
| Rab2          | 1418622_at   | 0.93     | X       | X                    |
| Ywhaz         | 1448218_s_at | 0.93     | X       | X                    |
| Capza2        | 1423058_at   | 0.92     |         |                      |
| Dnaja2        | 1417183_at   | 0.91     | X       | X                    |
| Pcmt1         | 1431085_a_at | 0.91     | X       |                      |
| Arf1          | 1420920_a_at | 0.91     | X       | X                    |
| Eif4e         | 1450908_at   | 0.91     | X       |                      |
| Arl1          | 1451025_at   | 0.91     | X       | X                    |
| Ppp2cb        | 1421823_at   | 0.91     | X       | X                    |
| Pja1          | 1426449_a_at | 0.91     | X       | X                    |
| Rpl5          | 1451077_at   | 0.9      | X       | X                    |
| Sept7         | 1454610_at   | 0.9      | X       | X                    |
| 2310004103Rik | 1428698_at   | 0.89     |         |                      |
| Vps24         | 1428165_at   | 0.89     | X       | X                    |
| Mat2b         | 1448196_at   | 0.89     | X       | X                    |
| Tde2          | 1415838_at   | 0.89     | X       | X                    |
| Ywhaq         | 1420828_s_at | 0.89     | X       | X                    |
| Psarl         | 1433478_at   | 0.89     |         |                      |
| Tgfb1i4       | 1454758_a_at | 0.89     | X       | X                    |
| Hnrpab        | 1453849_s_at | 0.88     | X       | X                    |
| Gabarapl1     | 1416418_at   | 0.88     | X       | X                    |
| Tspyl1        | 1415908_at   | 0.88     | X       | X                    |
| 3930401K13Rik | 1451994_s_at | 0.88     |         |                      |
| Ga17          | 1451076_s_at | 0.88     |         | X                    |

This table displays all of the genes within the brown module that were examined using the Allen Brain Atlas. The top twenty-five genes that had their maximum  $k_{ME}$  within the black module were selected, and the gene expression was visually inspected. The module eigengene was used to determine which regions to examine. An (X) within the table denotes presence of expression in that area and a blank cell denotes absence of expression.

**Supplemental Table 7 – Expression within the midnight blue (#7) module using the Allen Brain Atlas**

| Gene Symbol   | Probe        | $k_{ME}$ | Layer V | Layer VI | Basolateral Amygdala |
|---------------|--------------|----------|---------|----------|----------------------|
| 5330431N19Rik | 1452603_at   | 0.91     | X       | X        | X                    |
| Ppp1ca        | 1460165_at   | 0.91     | X       | X        | X                    |
| Slc25a22      | 1452653_at   | 0.9      | X       | X        | X                    |
| Synj2         | 1452344_at   | 0.9      | X       | X        | X                    |
| Tomm34        | 1448345_at   | 0.89     | X       | X        | X                    |
| Slc7a4        | 1426068_at   | 0.89     | X       | X        | X                    |
| Ppp2r5c       | 1427003_at   | 0.88     |         |          |                      |
| Ap3m2         | 1417527_at   | 0.88     | X       | X        | X                    |
| Hk1           | 1437974_a_at | 0.88     | X       | X        | X                    |
| Pak1          | 1420980_at   | 0.87     | X       | X        | X                    |
| Fbxo31        | 1417969_at   | 0.87     | X       | X        | X                    |
| Atp6v1d       | 1416952_at   | 0.86     | X       | X        | X                    |
| Dusp14        | 1431422_a_at | 0.86     | X       | X        | X                    |
| Cap2          | 1450910_at   | 0.86     | X       | X        | X                    |
| Camk2b        | 1448676_at   | 0.86     | X       | X        | X                    |
| Dph2l1        | 1418335_a_at | 0.86     |         |          |                      |
| Stx6          | 1450844_at   | 0.86     | X       | X        |                      |
| Ssna1         | 1448643_at   | 0.86     | X       | X        | X                    |
| Cyfp2         | 1449273_at   | 0.85     | X       | X        | X                    |
| 1110008P14Rik | 1459890_s_at | 0.85     | X       | X        | X                    |
| Nudt3         | 1451575_a_at | 0.85     | X       | X        | X                    |
| Lin7b         | 1418683_at   | 0.85     | X       | X        | X                    |
| Rab33a        | 1417529_at   | 0.85     |         |          |                      |
| Myo18a        | 1451422_at   | 0.85     | X       | X        | X                    |
| Fancl         | 1423624_at   | 0.8      |         |          |                      |

This table displays all of the genes within the brown module that were examined using the Allen Brain Atlas. The top twenty-five genes that had their maximum  $k_{ME}$  within the black module were selected, and the gene expression was visually inspected. The module eigengene was used to determine which regions to examine. An (X) within the table denotes presence of expression in that area and a blank cell denotes absence of expression.

**Supplemental Table 8 - Correlation between module eigengenes and mean firing rate**

|  | <b>Correlation</b> | <b>P-value</b> |
|--|--------------------|----------------|
|  | -0.66              | 0.00001        |
|  | 0.62               | 0.00006        |
|  | 0.59               | 0.00010        |
|  | -0.57              | 0.00027        |
|  | 0.44               | 0.00665        |

|  |       |         |
|--|-------|---------|
|  |       |         |
|  | 0.43  | 0.00855 |
|  | -0.35 | 0.03729 |
|  | 0.27  | 0.11770 |



|  |       |         |
|--|-------|---------|
|  |       |         |
|  | 0.13  | 0.43351 |
|  | -0.13 | 0.43502 |
|  | -0.13 | 0.44427 |

|  |       |         |
|--|-------|---------|
|  | -0.09 | 0.58894 |
|  | -0.03 | 0.87288 |

This table summarizes the correlation between the current clamp data and the first principal component of each module. The correlation of the first four modules (black, blue, pink, and yellow) is significant after correction for multiple comparisons ( $p < 0.004$ ).

**Supplemental Table 9 - Comparison between modules and organelle proteome**

| Module                 | Nucleus | EE   | ER   | Golgi  | Membrane | Mitochondria | RE     | ER/Golgi vesicle |
|------------------------|---------|------|------|--------|----------|--------------|--------|------------------|
| Black (#1)             | 0.37    | 2.28 | 0.71 | 2.12*  | 1.58     | 0.52         | 1.85   | 2.49*            |
| Blue (#2)              | 0.63    | 0.65 | 0.81 | 0.69   | 0.72     | 3.43**       | 0.4    | 0.61             |
| Brown (#3)             | 1.87*   | 2.4  | 1.8  | 2.29** | 2.66**   | 0.88         | 3.31** | 1.95*            |
| Green (#4)             | 0.38    | 0.78 | 1.59 | 1.14   | 0.98     | 0.63         | 1.27   | 1.34             |
| Green yellow (#5)      | 0.41    | 0    | 0.39 | 0.67   | 0        | 0.58         | 0      | 0.39             |
| Light yellow (#6)      | 0       | 0    | 0.85 | 0.36   | 0.38     | 0.31         | 0.55   | 0.42             |
| Midnight blue (#7)     | 0.23    | 0    | 1.53 | 0.93   | 0.78     | 0.48         | 0.85   | 1.09             |
| Orange (#8)            | 1.15    | 0    | 0    | 0      | 1.64     | 0.27         | 1.2    | 0                |
| Pink (#9)              | 0.43    | 0    | 0.41 | 0.53   | 0.37     | 0.3          | 0.13   | 0.41             |
| Purple (#10)           | 1.12    | 1.15 | 1.79 | 0.91   | 1.27     | 1.31         | 1.4    | 1.07             |
| Red (#11)              | 2.02*   | 0    | 0.19 | 0.17   | 0.52     | 0.29         | 0      | 0.19             |
| Turquoise (#12)        | 1.04    | 1.83 | 1.14 | 1.46   | 0.64     | 2.41**       | 1.02   | 1.43             |
| Yellow (#13)           | 0.84    | 1.73 | 1.08 | 0.69   | 0.72     | 0.99         | 1.06   | 0.81             |
| Observed in network    | 77      | 25   | 80   | 94     | 90       | 109          | 123    | 80               |
| Obtained from database | 181     | 73   | 209  | 236    | 227      | 283          | 283    | 201              |

This table summarizes the comparison between the network defined modules and the proteomically defined organellar proteins. Each number corresponds to an observed/expected ratio. Out of the eight organelles examined, there were six that were significant without correction for multiple comparisons (\* $p < 0.05$ ) and of those four were significant after Bonferroni correction (\*\* $p < 0.004$ ). The last two rows describe how many proteins were in the network compared to the number obtained from the database. Abbreviations: EE - early endosome, ER - endoplasmic reticulum, RE - recycling endosome.

**Supplemental Table 10 - Comparison between modules and the synaptic proteome**

| <b>Module</b>      | <b>Synaptosome</b> | <b>Post-synaptic density</b> | <b>Pre-synaptic fraction</b> | <b>Synaptic vesicles</b> | <b>Composite</b> |
|--------------------|--------------------|------------------------------|------------------------------|--------------------------|------------------|
| Black (#1)         | 1.29               | 1.25                         | 0.86                         | 0                        | 1.25             |
| Blue (#2)          | 1.06               | 0.83                         | 0.49                         | 0                        | 1.05             |
| Brown (#3)         | 1.02               | 1.45*                        | 1.82                         | 0.92                     | 1.12             |
| Green (#4)         | 1.20               | 0.90                         | 2.37*                        | 0                        | 1.16             |
| Green yellow (#5)  | 0.63               | 0.12                         | 0                            | 0                        | 0.48             |
| Light yellow (#6)  | 0.80               | 0.99                         | 2.05                         | 0                        | 0.79             |
| Midnight blue (#7) | 0.89               | 1.15                         | 1.59                         | 2.69                     | 0.99             |
| Orange (#8)        | 0.59               | 1.19                         | 1.79                         | 0                        | 0.77             |
| Pink (#9)          | 0.68               | 0.90                         | 1.00                         | 0                        | 0.79             |
| Purple (#10)       | 0.93               | 0.94                         | 0                            | 0                        | 0.91             |
| Red (#11)          | 0.82               | 0.57                         | 0                            | 0                        | 0.71             |
| Turquoise (#12)    | 1.74**             | 1.55*                        | 1.04                         | 3.52*                    | 1.62**           |
| Yellow (#13)       | 0.90               | 1.27                         | 0.66                         | 1.67                     | 1.01             |
| Total              | 553                | 273                          | 33                           | 13                       | 728              |

This table summarizes the comparison between the network modules and the proteomically-characterized synaptic fractions. Each value corresponds to an observed/expected ratio. The composite represents all studies compiled into one list. The last row shows how many genes obtained from each study were present within the network. \*p<0.05 & \*\*p<0.004 (Bonferroni correction)
